# Supplementary material
Source: PubMed Central journal article supplement (PMC11065416)
Supplement: NIHMS1987491-supplement-supplemental_materials.pdf [file NIHMS1987491-supplement-supplemental_materials.pdf]

Multisensory Sensitivity Supplemental Materials

**Table S1.** The eigenvalues for 10 latent variables using 80 items from four MSS-related surveys (using exploratory factor analysis) (N = 614).

|    | Eigenvalue | Difference | Proportion | Cumulative |
|----|------------|------------|------------|------------|
| 1  | 20.97      | 17.63      | 0.262      | 0.262      |
| 2  | 3.34       | 0.39       | 0.042      | 0.304      |
| 3  | 2.94       | 0.44       | 0.037      | 0.341      |
| 4  | 2.51       | 0.23       | 0.031      | 0.372      |
| 5  | 2.28       | 0.16       | 0.028      | 0.400      |
| 6  | 2.11       | 0.33       | 0.026      | 0.427      |
| 7  | 1.79       | 0.07       | 0.022      | 0.450      |
| 8  | 1.72       | 0.10       | 0.022      | 0.471      |
| 9  | 1.62       | 0.03       | 0.020      | 0.491      |
| 10 | 1.59       | 0.14       | 0.020      | 0.511      |

Note: the four surveys included: AASP, Adolescent/Adult Sensory Profile; ASQ subscale, Adult Sensory Questionnaire sensitivity to sensory stimuli; HSPS, Highly Sensitive Person Scale; SSAS, Somatosensory Amplification Scale.

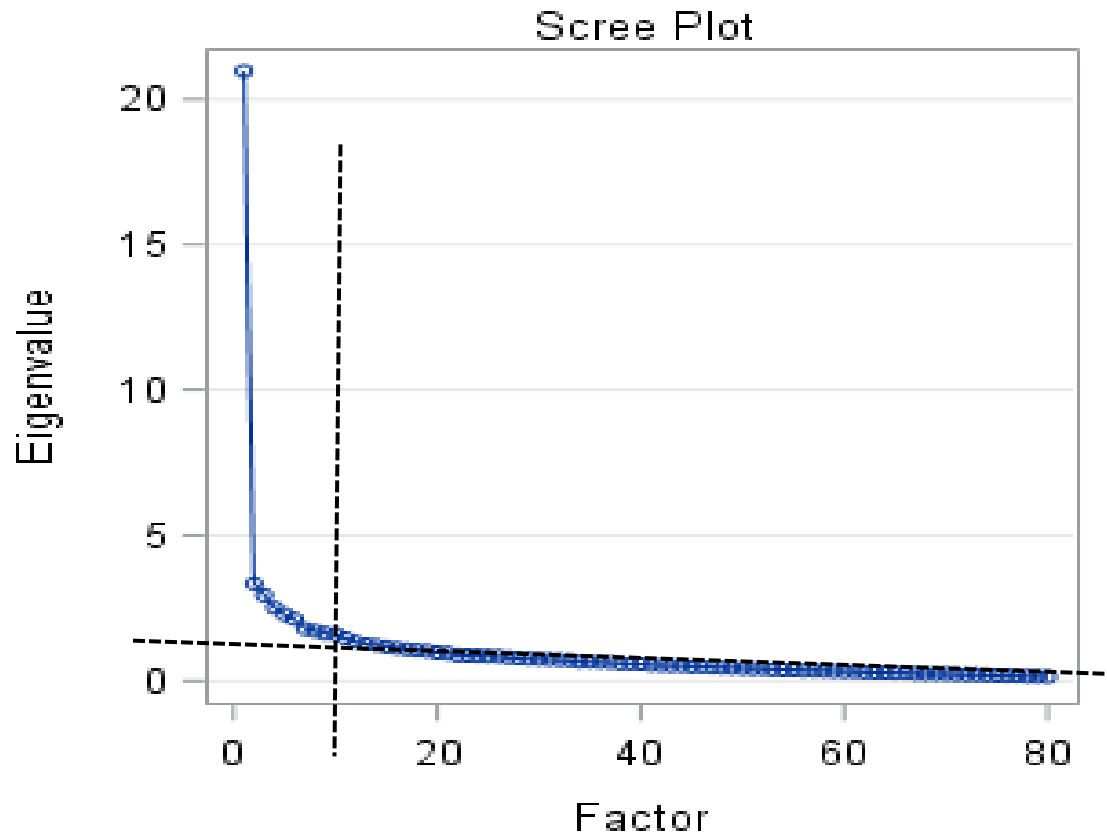

**Figure S1.** Scree plot of eigenvalues. Note: the cross of the dash lines corresponds to the solution of 10 latent variables, approximating where the change in eigenvalues first begins to notably deviate from the baseline noise.

Multisensory Sensitivity Supplemental Materials

**Table S2.** Inter-factor correlations between the 10 latent factors identified using 80 items from 4 MSS-related surveys† (N=614).

| Latent Factors |    |                            | 1           | 2           | 3           | 4           | 5           | 6           | 7    | 8           | 9    |
|----------------|----|----------------------------|-------------|-------------|-------------|-------------|-------------|-------------|------|-------------|------|
| Core           | 1  | Smell/Tactile Sensitivity  | 1           |             |             |             |             |             |      |             |      |
| Core           | 2  | Food / Texture Sensitivity | <b>0.24</b> | 1           |             |             |             |             |      |             |      |
| Core           | 3  | Sound/Startle Sensitivity  | <b>0.39</b> | <b>0.21</b> | 1           |             |             |             |      |             |      |
| Core           | 4  | Internal Body Sensitivity  | <b>0.28</b> | <b>0.21</b> | <b>0.31</b> | 1           |             |             |      |             |      |
| Assoc          | 5  | Noise-Distracton           | <b>0.28</b> | 0.13        | <b>0.41</b> | 0.15        | 1           |             |      |             |      |
| Assoc          | 6  | Vestibular                 | <b>0.35</b> | 0.18        | <b>0.37</b> | <b>0.24</b> | 0.16        | 1           |      |             |      |
| Assoc          | 7  | Aesthetic                  | 0.13        | -0.01       | <b>0.22</b> | 0.14        | 0.20        | 0.07        | 1    |             |      |
| Assoc          | 8  | Easily stressed            | <b>0.23</b> | 0.19        | <b>0.37</b> | 0.26        | <b>0.32</b> | <b>0.28</b> | 0.11 | 1           |      |
| Assoc          | 9  | Dislike crowds             | <b>0.33</b> | <b>0.22</b> | <b>0.39</b> | 0.20        | <b>0.34</b> | <b>0.31</b> | 0.09 | <b>0.33</b> | 1    |
| Assoc          | 10 | Fear                       | 0.11        | 0.11        | 0.07        | 0.10        | 0.07        | 0.08        | 0.05 | 0.07        | 0.03 |

† Note: the four Surveys included: AASP, Adolescent/Adult Sensory Profile; ASQ subscale, Adult Sensory Questionnaire sensitivity to sensory stimuli; HSPS, Highly Sensitive Person Scale; SSAS, Somatosensory Amplification Scale. Correlations > 0.20 are bolded.

Multisensory Sensitivity Supplemental Materials

**Table S3.** Summary participant characteristics and survey responses (Mean (SD) or Proportion, %) used to assess the potential new items to modify the original SSAS.

| Total (observed range)                  | All (n=647) | Women (n=463) | Men (n=183) | Raw-p†  | Adjusted-p† | Effect size † (95% CI)   |
|-----------------------------------------|-------------|---------------|-------------|---------|-------------|--------------------------|
| <b>Age (18-91 yrs)</b>                  | 48.3 (20.4) | 47.4 (20.2)   | 50.7 (20.8) | 0.07    | 0.91        | -0.16 (-0.34, 0.01)      |
| <b>BMI (16.5-57.3 kg/m<sup>2</sup>)</b> | 27.0 (6.5)  | 26.8 (6.8)    | 27.4 (5.9)  | 0.26    | 1.0         | -0.10 (-0.27, 0.07)      |
| <b>Race/Ethnicity</b>                   |             |               |             |         |             |                          |
| Caucasian (%)                           | 92.7%       | 92.9%         | 92.4%       | 0.82    | 1.0         | 0.04 (-0.32, 0.40)       |
| non-Hispanic (%)                        | 97.2%       | 98.0%         | 95.4%       | 0.08    | 1.0         | 0.46 (-0.07, 1.0)        |
| <b>Marital status</b>                   |             |               |             |         |             |                          |
| Never married (%)                       | 30.5%       | 31.8%         | 27.3%       | 0.27    | 1.0         | 0.12 (-0.09, 0.33)       |
| <b>Current employment status</b>        |             |               |             |         |             |                          |
| Employed (%)                            | 58.4%       | 59.4%         | 55.7%       | 0.40    | 1.0         | 0.08 (-0.11, 0.27)       |
| <b>Education level</b>                  |             |               |             |         |             |                          |
| College or higher (%)                   | 81.9%       | 80.8%         | 84.7%       | 0.24    | 1.0         | -0.15 (-0.41, 0.10)      |
| <b>Pain status</b>                      |             |               |             |         |             |                          |
| <b>Current Pain incidence (%)</b>       | 58.7%       | 57.0%         | 63.4%       | 0.16    | 1.0         | -0.15 (-0.34, 0.05)      |
| <i>Intensity‡ (mean, SD)</i>            | 2.4 (2.3)   | 2.6 (2.4)     | 1.8 (1.7)   | < 0.001 | <b>0.01</b> | <b>0.35 (0.19, 0.53)</b> |
| <b>Worst 7-day Pain incidence (%)</b>   | 93.5%       | 93.1%         | 94.5%       | 0.5     | 1.0         | -0.14 (-0.54, 0.27)      |
| <i>Intensity‡ (mean, SD)</i>            | 3.6 (2.3)   | 3.4 (2.2)     | 3.7 (2.4)   | 0.16    | 1.0         | -0.13 (-0.30, 0.04)      |
| <b>Average 7-day Pain incidence (%)</b> | 78.6%       | 77.3%         | 82.0%       | 0.19    | 1.0         | -0.16 (-0.40, 0.08)      |
| <i>Intensity‡ (mean, SD)</i>            | 2.0 (1.6)   | 1.7 (1.5)     | 2.1 (1.7)   | 0.02    | 0.26        | -0.26 (-0.43, 0)         |

Notes: BMI, Body Mass Index; PSQ, Pain Sensitivity Questionnaire; MSAS, Multisensory Amplification Scale. Significant values are bolded.

† Sex-differences comparisons adjusted by Bonferroni Correction; Effect size is positive when values are higher for women than men. One subject did not report sex.

‡ Mean pain intensity of those reporting pain > 0 for current, worst in past 7-days or average in past 7-days.

Multisensory Sensitivity Supplemental Materials

**Table S4.** Inter-item correlations for the 12-item Multisensory Amplification Scale<sup>a</sup> (N=647)

| Sensitivity item content, briefly: | 1            | 2            | 3            | 4            | 5            | 6            | 7            | 8            | 9            | 10           | 11           |
|------------------------------------|--------------|--------------|--------------|--------------|--------------|--------------|--------------|--------------|--------------|--------------|--------------|
| 1. smoke, pollutants               | 1.0          |              |              |              |              |              |              |              |              |              |              |
| 2. body awareness                  | <b>0.275</b> | 1.0          |              |              |              |              |              |              |              |              |              |
| 3. sudden loud noise               | <b>0.263</b> | <b>0.238</b> | 1.0          |              |              |              |              |              |              |              |              |
| 4. hot or cold                     | <b>0.322</b> | <b>0.260</b> | <b>0.337</b> | 1.0          |              |              |              |              |              |              |              |
| 5. hunger                          | 0.185        | <b>0.297</b> | <b>0.204</b> | <b>0.374</b> | 1.0          |              |              |              |              |              |              |
| 6. strong perfumes                 | <b>0.361</b> | 0.171        | <b>0.279</b> | <b>0.261</b> | 0.097        | 1.0          |              |              |              |              |              |
| 7. food textures                   | 0.096        | 0.156        | <b>0.263</b> | <b>0.238</b> | 0.139        | 0.123        | 1.0          |              |              |              |              |
| 8. certain fabrics                 | 0.132        | <b>0.210</b> | <b>0.271</b> | <b>0.255</b> | <b>0.255</b> | <b>0.277</b> | <b>0.380</b> | 1.0          |              |              |              |
| 9. bright lights                   | 0.180        | <b>0.208</b> | <b>0.409</b> | <b>0.322</b> | 0.193        | <b>0.294</b> | <b>0.282</b> | <b>0.331</b> | 1.0          |              |              |
| 10. background sound               | <b>0.213</b> | <b>0.204</b> | <b>0.370</b> | <b>0.265</b> | <b>0.263</b> | <b>0.272</b> | 0.161        | <b>0.303</b> | <b>0.378</b> | 1.0          |              |
| 11. sunshine                       | 0.154        | 0.157        | <b>0.272</b> | <b>0.303</b> | 0.127        | 0.189        | 0.154        | 0.158        | <b>0.453</b> | <b>0.261</b> | 1.0          |
| 12. types of clothing              | 0.190        | <b>0.241</b> | <b>0.248</b> | <b>0.283</b> | <b>0.212</b> | <b>0.288</b> | <b>0.344</b> | <b>0.581</b> | <b>0.332</b> | <b>0.412</b> | <b>0.236</b> |

<sup>a</sup>Pearson Correlation Coefficients.

Note: all items were significantly correlated but values > 0.2 are highlighted in bold and > 0.3 shaded to better characterize which items are most closely related.

Multisensory Sensitivity Supplemental Materials

**Table S5.** Summary participant characteristics (Mean (SD) or Proportion, %) for the separate, test-retest reliability study cohort.

| Total<br>(observed range)              | All<br>(n=158) | Women<br>(n=138) | Men<br>(n=20) | Raw<br>p-value | Adjusted-<br>p |
|----------------------------------------|----------------|------------------|---------------|----------------|----------------|
| <b>Age (18 - 70 yrs)</b>               | 25.9 (11.8)    | 26.2 (12.2)      | 24.3 (8.4)    | 0.98           | 1.0            |
| <b>Race/Ethnicity</b>                  |                |                  |               |                |                |
| Caucasian (%)                          | 89.2%          | 89.9%            | 85%           | 0.51           | 1.0            |
| non-Hispanic (%)                       | 89.2%          | 89.1%            | 90%           | 0.91           | 1.0            |
| <b>Education level</b>                 |                |                  |               |                |                |
| College or higher, (%)                 | 43.7%          | 44.2%            | 40%           | 0.72           | 1.0            |
| <b>Pain incidence (%)</b>              |                |                  |               |                |                |
| Current pain>0                         | 65.8%          | 65.9%            | 65%           | 0.93           | 1.0            |
| Current pain≥3                         | 18.4%          | 18.1%            | 20%           | 0.84           | 1.0            |
| <b>Pain intensity (if pain &gt; 0)</b> |                |                  |               |                |                |
| Current pain (0 - 10)                  | 2.3 (2.1)      | 2.2 (1.9)        | 3.3 (3.0)     | 0.20           | 1.0            |
| Worst pain (0 - 9)                     | 3.9 (2.2)      | 3.9 (2.2)        | 4.4 (2.3)     | 0.30           | 1.0            |
